# Supplementary material for: Tissue-specific isoforms of the single C. elegans Ryanodine receptor gene unc-68 control specific functions
Source: PubMed Central journal article supplement (PMC7644089; doi:10.1371/journal.pgen.1009102), 2020-10-26
Supplement: pgen.1009102.s006.pdf [file pgen.1009102.s006.pdf]

cagtgagcaaactgtcgttacagtgttgcgggataaaaatacatataaagaaccaagtatgaaacacgtaattcaatgttgcattacgt  
tgcagcgtgaaaagaaaatatgtacttatgtattacatgccctcattttattagtaatttttaagccatgaaaaataaaaacgtgaaccaca  
atttgatttttagacttagg

Edited sequence (left and right of the deletion with a different color):

ttgatagaaggatataccatataaaattcatatgttcagaaaactcgagattcaatcacaacgattttctatggggaatgagagcaaga  
aaggaaattatgacaaaataataaacaccatcaaattgatcaaagaagagtgaagttgcaaatagtatggagagattcttgaaagt  
gagtttcagatattttgatgtcgtttgaaaattgtaacagaatggaatcagaacatcttcgtttatattggaaattttctgtaaactaaaacc  
tcaaaaaacaaattatgttaaaattttattctcaaaacactagtagttgctataaaagttgaagttgaaaggaattgacataaaatgctcaa  
actccaataattttttgataggttaaatttagattgaaaaattaaggtgttgcctatttccgaattaatgaattcgatttgaagttttactggc  
ccaacttttccaaattccaaatatttttcagggcaatcacgaaattcaactccggtcttgatgaagaaacgatgatgaggttacgaaat  
gaaacgatgaatctagactaaaacgaattgtgttttgatttcttttttaaaagtagtttcagatcttccagatactattcgtaatagttgt  
ttccagttttattcaaaacagacaaagtcaagttgacaattagttctccggtgactttcggagggaatattcggctctcacttgaatgta  
gatcgataacatcgataacatttgaaatattaattctgaattttttgcatttaattgtgtagtacggaatgttgacttttcaaatttgcaaa  
aatgtgccacctgcctaaacgagtgaaaagaaggaccctccggggtgtaagtcgcgattcgcaaatctcgtaaaaagagaaac  
gacaaaagagaaaaagcacttccgcatacctctgtttgattgtaacataaaagtcgtttgttccgtatagtttaaaatttttgaactctcc  
taccttatgaaatgaattcaattctactacaattgagcatgtgtgaaagtttatagtaaccgaaaaactaccattgtattttgctcaagtcaa  
aatctagtaagatttctagtaaaagctccatcttaatgataagctttcaaaaatctgcttccactcggtcggaggcgcctctcaccgcctc  
gctcccagtgagcaaactgtcgttacagtgttgcgggataaaaatacatataaagaaccaagtatgaaacacgtaattcaatgttgc  
attacgttgcagcgtgaaaagaaaatatgtacttatgtattacatgccctcattttattagtaatttttaagccatgaaaaataaaaacgtga  
accacaatttgatttttagacttagg





~~egtgetattactaegataatecetaaaatattacaanteateccatataagataaagtcctetagtffctctctteteceegatetetettegtttte~~  
~~etogagagacttatgtgeccatattggcattcageegtcceceggtecegectattgttttttegtcgettttttttggctencaatttttgg~~  
~~gaetfctcagtttctagacaaaagagactccacattagaagctctgctctagggcageaaaactcattagtttttgcacaacaagcctccgcaga~~  
~~caataacacgeaaaacacattacaaeagcagatataaataatattctcagtgatagattagtttccaaagaatggattttgatttcaegg~~  
~~atatctcagatgaggatcataactatgttacaaaggtttgttttaaaagaactattctatataaacggaaagtctggaaatcacaagaggac~~  
~~gggaaatgaattttctttttttgataaaatttttatttccaggagacatcgtctgcctctctcgttgcctcacacaatagagatggagtt~~  
~~ctggggtcagaaggttgggtgacatttttgggaaacttttcttgagaagttgggcctaataataatttttttaaaaagtttttgagccgaaa~~  
~~atgtttcagaagacgatctattgagaaattaaagttgtggatatacggatccaaaaacatcagaatcagcgcagttcttgatactggagc~~  
~~tcaagaacaacaatttaaaaaattataagttttccacaataatttcagagtttgttgtgcaccgaaggccttggaaaccggatgtgcacac~~  
~~tggaaaacgtgtcggacaaggacatcccgcagatattgcaatgtgcatgctttacatcgataacgcactgtc gatgagagcattacag~~  
~~gaaatgatgtcagcggatagtgatc atgtgagtttttttaattaaataatttttcgcatataatggaaagatacagtt~~

Edited sequence (left and right of the deletion with a different color and synonymous mutations are labelled in purple):

~~actataaatcccaaatctcagctcagtgaaatgctttaaaataaaaattaactcaaatcagagcagttttgaatttttcaactctcttcaaaa~~  
~~atattaaacgcacgtaaattttgtattgaaggaaatatttactttactgcttgcaattgaaaatagatttctactttccacttataaaaatc~~  
~~tcaaaaacctccttgcaataaatctaaaatatacccataatttccgttcgtttttctgctcttttgcctccgtttgtatttttttttgcgtttt~~  
~~cccaagtggtaccagcacctctagttttttgtttacagatgcaaaaccagtgaaaaacggaacgaactgagtgagcagatataagaac~~  
~~gaaaccgaccgaacattatcagatcgacgatcgacaacgatggccgacaaggaggagcagggaggagcgaacaggatgatgtct~~  
~~ctttt**ctacgaacc**ggagacatcgtctgcct**ctc**gtgctgttgcctcacacaatagagatggagttctcgggtcagaaggttgggtgacat~~  
~~ttttgggaaacttttcttgagaagttgggcctaataataatttttttaaaaagtttttgagccgaaaatgtttcagaagacgatctattgaga~~  
~~aattaaagttgtggatatacggatccaaaaacatcagaatcagcgcagttcttgatactggagctcaagaacaacaatttaaaaaattata~~  
~~agttttccacaataatttcagagtttgttgtgcaccgaaggccttggaaaccggatgtgcacactggaaaacgtgtcggacaaggacat~~  
~~cccgcagatattgcaatgtgcatgctttacatcgataacgcactgtc gatgagagcattacaggaaatgatgtcagcggatagtgatca~~  
~~tgtgagtttttttaattaaataatttttcgcatataatggaaagatacagtt~~

Strain: PHX217

Allele: *syb217*

Description: Deletion of *unc-68* exon 1.2

Wild type sequence (with deletion in double strikethrough):

aaactcatagtattttgccaacaagcatccgcagacaaatacacgcaaacacaattacaacgcagatataaatatattattcagtgatag  
attagttagtccaagaaatggatttgatttaacggatateteagatgaggatcataactatgttaacaagggttttaaagaactattctat  
attaacggaaagtctggaaatcacagaggacagaggaaatgaattcttttttgataaaatftttattccag

Edited sequence (left and right of the deletion with a different color):

aaactcatagtattttgccaacaagcatccgcagacaaatacacgcaaacacaattacaacgcagatataaatatattattcagtgatag  
attagttagtccaagaaattaaagaactattctatattaaacggaaagtctggaaatcacagaggacagaggaaatgaattcttttttt  
gataaaatftttattccag



Strain: PHX219

Allele: *syb219*

Description: Deletion of alternative *unc-68* exon 12.2

Wild type sequence (with deletion in double strikethrough):

tagatagattttaactgaaattatttatag~~cttcag~~ggatagtgatagaaggaaagaagaaaaagctgcacaa

Edited sequence (left and right of the deletion with a different color and synonymous mutations are labelled in purple):

tagatagattttaactgaaattatttatagggattcggatagaaggaaagaagaaaaagctgcacaa

Strain: PHX220

Allele: *syb220*

Description: Deletion of alternative *unc-68* exon 13

Wild type sequence (with deletion in double strikethrough):

agcttctccgctttctgtactttaagcacatccgattttcaatcaataatftttcaatttcaactaacttcaatttcagaagaagtctactggaact  
 gccacatgatgagcgacaaattgctgaagacagtatgagagacttaacgatcgtcattctgagaaacaaagaaggagggtcttctaa  
 gcaggctcagagattcaagtaatactcgcaaaaagtaagagtcattagaaaaatgtagatagatttactgaaattattatagcttcagg  
 gatagtatagaaggaaagaagaaaaagctgcacaattgcgacaaatgaaggcaattcaagaagtttgatgcaggaagtcttgata  
 cgtaacccttccaactggtcagaaggatgtattg~~ctttagtctttgaaagtcaaaaaataaaagatgaagaatggtaaaccaatgataa~~  
~~tttgatttgactcaacagcagcagcttgcnaattttaataaaaaagtctctatcaaaaaetttagaacattateagctctccaatagctact~~  
~~agaaaccttagtagtagaattattcagaagaagaaacagaagcagcagcctatttgggtcatgcaagaccaatttcagcagcagaat~~  
~~acagtgctcgggtgagcagtaegeegeateagcctctctttcagatctttcctcaacattcttaccctttccatacctttctctgagcagatg~~  
~~actegcattatcactcctttctctcctaccctcattcaaatcttaattctaatgaaaaacagctcaaaattgtagcttacttcaattttt~~  
~~agcctctagcagatgccactatccggaccaggtcgacaattgacgatcaagagaagttctattaagaaaaacaaaaaggaaagaa~~  
 ggtatattagaaagtagagattttcaagttactttttccaggccgaaatcgtcttgagaagatggaacgagagaagaaaggctcaa  
 ttataccaatggatgctcagctagatgtgctccaagaaggagacgccatgcactgttcaccacaaggataaggttgatgaatactact  
 acggtatcagaatcttccaggcaagatccatctcaagatgggttgatgggtcaccacacaataccactattataatgtcaactttgat  
 ggaagtcaaggagtcagaaaaatgtagattctcagaagccgatcatcacggaact

Edited sequence (left and right of the deletion with a different color and synonymous mutations are labelled in purple):

agcttctccgctttctgtactttaagcacatccgattttcaatcaataatftttcaatttcaactaacttcaatttcagaagaagtctactggaact  
 gccacatgatgagcgacaaattgctgaagacagtatgagagacttaacgatcgtcattctgagaaacaaagaaggagggtcttctaa  
 gcaggctcagagattcaagtaatactcgcaaaaagtaagagtcattagaaaaatgtagatagatttactgaaattattatagcttcagg  
 gatagtatagaaggaaagaagaaaaagctgcacaattgcgacaaatgaaggcaattcaagaagtttgatgcaggaagtcttgata  
 cgtaacccttccaactggtcagaaggatgtactggcctttggcagatgccactatccggaccaggtcgacaattgacgatcaagag  
 aagttctattaagaaaaacaaaaaggaaagaaggtatattagaaagtagagattttcaagttactttttccaggccgaaatcgtct  
 tgagaagatggaacgagagaagaaaggctcaattatccaatggatgctcagctagatgtgctccaagaaggagacgccatgcact  
 gttcaccacaaggataaggttgatgaatactactacggtatcagaatcttccaggcaagatccatctcaagatgggttgatgggtc  
 accacacaataccactattataatgtcaactttgatggaagtcaaggagtcagaaaaatgtagattctcagaagccgatcatcacggaact

Strain: PHX471

Allele: *syb471*

Description: wrmScarlet (intron free) in frame upstream of *unc-68* exon 1.1

Wild type sequence:

```
tttgtaaaagcgctaacatgcaaatgttgattaatgaagtaagaaagctatactataaatcccaaatctcagctcagtgaatatgctttaa
aataaaaattaactcaaatcagagcagttttgaatttttcaactctctcaaaaatattaacgcacgttaattttgtattgaaggaaatatt
attcactttactgcttgcaacttgaaaatagtatttctacttttccactttaaaaaatctcaaaaacctccttgcaataaatctaaaatccccat
aattttccgttcgtttttctgctgcttttgcctccgtttgtatttttttttgcgttttccaagtgtaccagcacctctagttttttgtttacag
atgcaaaaccagtgaaaaacggaacgaactgagtgagcagatataagaacgaaaccgaccgaacattatcagatcgacgatcgaca
acgatggccgacaaggaggagcagggaggaggcgaacaggatgatgtctcttttccgaacggttagttttattcaaaacagacaaa
gttcaagttgacaattagttctccggttgacttttcggaggggaatatttcggctctcacttgaatgtagatcgataacatcgataacattttg
aaatattaatttctgaatttttttgcatttaattgtgtagtacggaatgtgtacttttcaaattgtgcaaaaatgtgccacctcgcttaacgag
tgaagaagaagaggacctccggggtgtaagtgcgcgattcgcaaat
```

Edited sequence (left and right of the insertion with a different color, WormScarlet sequence is in orange and synonymous mutations are labelled in purple):

```
tttgtaaaagcgctaacatgcaaatgttgattaatgaagtaagaaagctatactataaatcccaaatctcagctcagtgaatatgctttaa
aataaaaattaactcaaatcagagcagttttgaatttttcaactctctcaaaaatattaacgcacgttaattttgtattgaaggaaatatt
attcactttactgcttgcaacttgaaaatagtatttctacttttccactttaaaaaatctcaaaaacctccttgcaataaatctaaaatccccat
aattttccgttcgtttttctgctgcttttgcctccgtttgtatttttttttgcgttttccaagtgtaccagcacctctagttttttgtttacag
atgcaaaaccagtgaaaaacggaacgaactgagtgagcagatataagaacgaaaccgaccgaacattatcagatcgacgatcgaca
acgatggtcagcaagggagagggcagttatcaaggagttcatgcgtttcaaggtccacatggagggatccatgaacggacacgagttc
gagatcgagggagagggagagggacgtccatacaggggaaccaaaaccgccaagctcaaggtcaccaagggaggaccactccc
attctctgggacatcctctcccacaattcatgtacggatcccgtgccttcaccaagcaccagccgacatcccagactactacaagca
atccttcccagagggattcaagtgggagcgtgtcatgaacttcgaggacggaggagccgtcaccgtcaccgaagacacctcctcga
ggacggaacctcactacaaggtcaagctccgtggaaccaactcccaccagacggaccagtcatagcaaaaagaagaccatgggat
gggaggcctccaccgagcgtctctaccagaggacggagtcctcaagggagacatcaagatggccctccgtctcaaggacggagg
acgttacctcgccgacttcaagaccacctacaaggccaagaagccagtcctcaaatgccaggagcctacaacgtcgaccgtaagctcga
catcacctcccacaacgaggactacaccgtcgtgagcaatacagcgttccgagggacgtcactccaccggaggaatggacgagc
tctacaagatggccgacaaggaagagcagggaggaggcgaacaggatgatgtctcttttccgaacggttagttttattcaaaacaga
caaagttcaagttgacaattagttctccggttgacttttcggaggggaatatttcggctctcacttgaatgtagatcgataacatcgataaca
ttttgaaatattaatttctgaatttttttgcatttaattgtgtagtacggaatgtgtacttttcaaattgtgcaaaaatgtgccacctcgcttaa
cgagtgaagaagaagaggacctccggggtgtaagtgcgcgattcgcaaat
```

Strain: PHX729

Allele: *syb729*

Description: mNeonGreen in frame upstream of *unc-68* exon 1.2

Wild type sequence:

```
ctccttctcccgatctctcttcgtttccctcgagagacttatgtcgcccatatggcattcagccgccccgggtcccgcctattgttttctgt
cgctcttttttggctcacaattttggtgactcttcagtttcagacaaagagactccacattagaagtctgctctaggcagcaaacctata
gtattttgccaacaagcatccgcagacaaatacacgaaacacaattacaacgcagatataaatatattattcagtgatgattagttag
ttccaagaaatggattttgatttcacggatatctcagatgaggatcataactatgttacaaggtttgtttaaaagaactattctatattaaac
gaaagtctggaaatcacagaggacagaggaaatgaatttctttttgataaaattttttccaggggagacatcgctcgcctctctgcg
gttcctcacacaatagagatggagttctcgggtcagaaaggttggtg
```

Edited sequence (left and right of the insertion with a different color, mNeonGreen sequence is in blue and synonymous mutations are labelled in purple):

```
ctccttctcccgatctctcttcgtttccctcgagagacttatgtcgcccatatggcattcagccgccccgggtcccgcctattgttttctgt
cgctcttttttggctcacaattttggtgactcttcagtttcagacaaagagactccacattagaagtctgctctaggcagcaaacctata
gtattttgccaacaagcatccgcagacaaatacacgaaacacaattacaacgcagatataaatatattattcagtgatgattagttag
ttccaagaaatggctccaaggagaggaggacaacatggcctccctcccagccaccacgagctccacatcttcggatccatcaac
ggagtgcacttcgacatggtcggacaaggaaccggaacccaaacgacggatagaggagctcaacctcaagtccaccaaggtaa
gtttaaacatatataactaactaacctgatttttaaatttcaggggagacctccaattctccccatggatcctcgtccacacatcggata
cggattccaccaatacctcccatacccagacggaatgtccccattccaagccgcatggtcgcagggatccggataccaagtcaccgt
accatgcaattcgaggacggagcctcctcaccgtcaactaccgttacacctacgagggatccacatcaaggttaagttaaacagttc
ggtactaactaaccatacatatttaaattttcaggggagaggcccaagtaagggaaccggattcccagccgacggaccagtcagacc
aactcctcaccgcccggactggtgccgttccaagaagacctaccacaaacgacaaggttaagttaaacatgattttactaactaactaa
tctgatttaaatttcagaccatcatctccacctcaagtgtcctacaccaccggaacggaaagcgttaccgttcaccgcccgtacca
cctacaccttcgccaagccaatggccgccaactacctcaagaaccaaccaatgtacgtcttcgtaagaccgagctcaagcactcaa
gaccgagctcaactcaaggagtggaagggcctcaccgacgtcatgggaatggacgagctctacaagatggattttgatttcacgg
atatctcagatgagatcataactacgttacaaggtttgtttaaaagaactattctatattaaacggaaagtctggaaatcacagaggac
agaggaaatgaatttcttttttataaaattttttccaggggagacatcgctcgcctctctcgttcctcacacaatagagatggagt
tctcgggtcagaaaggttggtg
```
