# Supplementary material for: Tissue-specific isoforms of the single C. elegans Ryanodine receptor gene unc-68 control specific functions
Source: PubMed Central journal article supplement (PMC7644089; doi:10.1371/journal.pgen.1009102), 2020-10-26
Supplement: pgen.1009102.s008.pdf [file pgen.1009102.s008.pdf]

**S3 File. Raw data used for tissue-specific SRT analysis**

| <b>Replicate name in<br/><i>Ma et al.</i></b> | <b>Total number of<br/>transcripts<br/>analyzed</b> | <b>Number of ex1.1-<br/>containing transcripts<br/>(flagged as <i>trans</i>-site,<br/><i>position V-6929038</i>, in<br/><i>Ma et al.</i>)</b> | <b>Number of ex1.2-<br/>containing transcripts<br/>(flagged as <i>cis</i>-site,<br/><i>position V-6924806</i>, in<br/><i>Ma et al.</i>)</b> |
|-----------------------------------------------|-----------------------------------------------------|-----------------------------------------------------------------------------------------------------------------------------------------------|---------------------------------------------------------------------------------------------------------------------------------------------|
| muscle_G16C_d12_1                             | 571844                                              | 0                                                                                                                                             | 0                                                                                                                                           |
| muscle_G16C_d12_2                             | 2232792                                             | 112                                                                                                                                           | 0                                                                                                                                           |
| neuron_G16C_d12_1                             | 164667                                              | 0                                                                                                                                             | 5                                                                                                                                           |
| neuron_G16C_d12_2                             | 317345                                              | 2                                                                                                                                             | 9                                                                                                                                           |

Raw data were retrieved in the supplements from: Ma, X., Zhan, G., Sleumer, M. C., Chen, S., Liu, W., Zhang, M. Q., & Liu, X. (2016). Analysis of *C. elegans* muscle transcriptome using trans-splicing-based RNA tagging (SRT). *Nucleic acids research*, 44(21), e156. <https://doi.org/10.1093/nar/gkw734>
